# Supplementary material for: Deep imaging in the brainstem reveals functional heterogeneity in V2a neurons controlling locomotion
Source: PubMed Central journal article supplement (PMC7821901; doi:10.1126/sciadv.abc6309), 2020-12-04
Supplement: abc6309_SM.pdf [file abc6309_SM.pdf]

## Supplementary Materials for

### **Deep imaging in the brainstem reveals functional heterogeneity in V2a neurons controlling locomotion**

Joanna Schwenkgrub, Evan R. Harrell, Brice Bathellier\*, Julien Bouvier\*

\*Corresponding author: Email: [brice.bathellier@cnrs.fr](mailto:brice.bathellier@cnrs.fr) (B.B.); [julien.bouvier@cnrs.fr](mailto:julien.bouvier@cnrs.fr) (J.B.)

Published 4 December 2020, *Sci. Adv.* **6**, eabc6309 (2020)

DOI: [10.1126/sciadv.abc6309](https://doi.org/10.1126/sciadv.abc6309)

#### **The PDF file includes:**

Figs. S1 to S6

Legends for movies S1 and S2

#### **Other Supplementary Material for this manuscript includes the following:**

(available at [advances.sciencemag.org/cgi/content/full/6/49/eabc6309/DC1](https://advances.sciencemag.org/cgi/content/full/6/49/eabc6309/DC1))

Movies S1 and S2

# Supplementary Materials

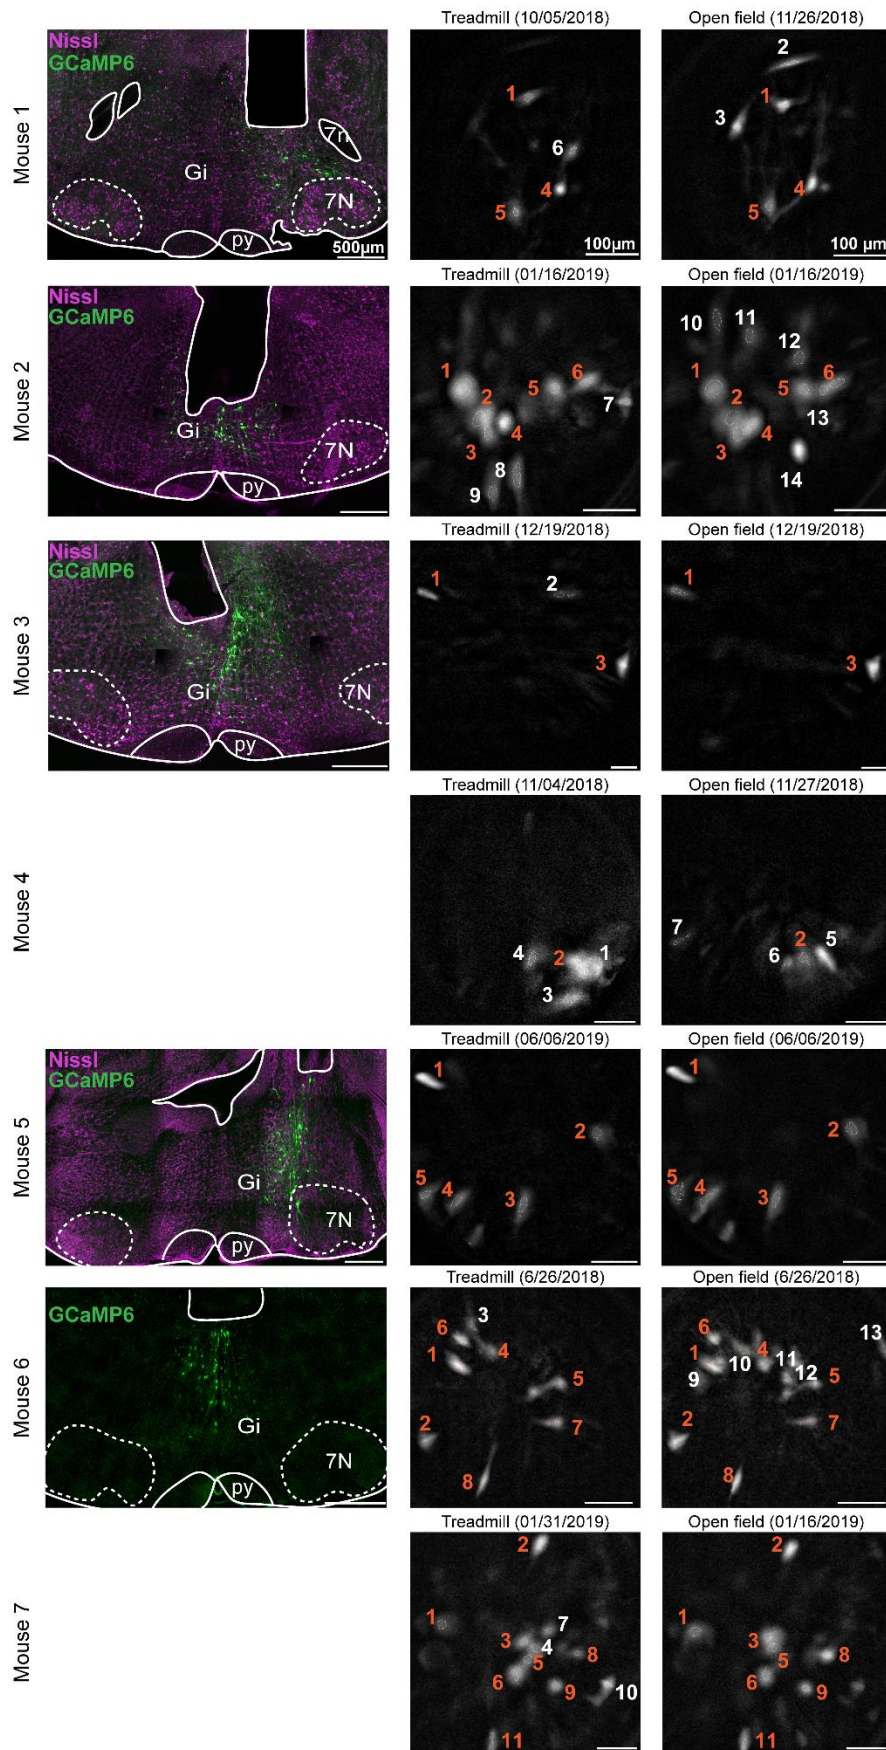

**Fig. S1. Histology of animals used in the study and stability of recorded fields of view across experiments.**

Histological data (coronal sections, 100  $\mu\text{m}$ ; unavailable for mouse no. 5 and 7) with the corresponding cell contour maps of all animals used in the study to the right. For each recorded mouse, the map of cell contours extracted by PCA/ICA for the recording sessions on the treadmill (left) and in the open field (right) are displayed. The two sessions were done on the same day or on different days depending on the animal (dates are given above the images). Cells that were seen in both sessions are numbered with red digits and cells that were seen in only one session are numbered with white digits.

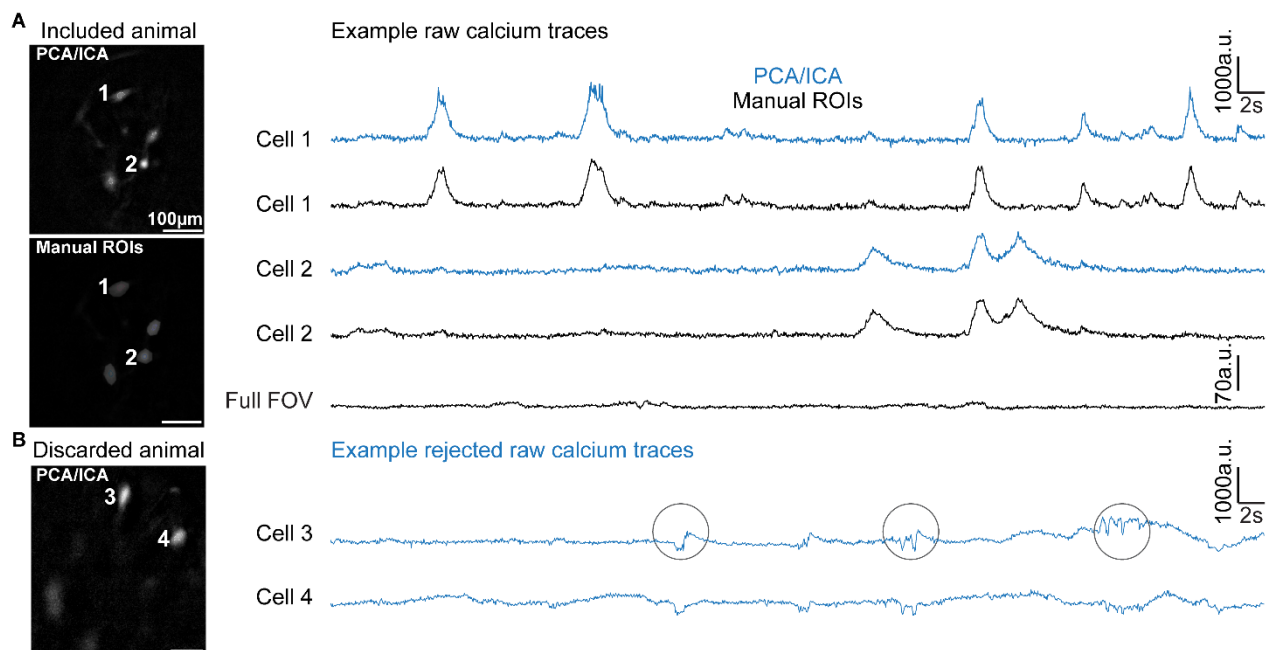

**Fig. S2. Example traces for stable and motion-contaminated recordings.**

(A). (top left) Example cell contour map obtained after PCA/ICA demixing. (bottom left) Same image overlaid with the 4 masks of manually selected regions-of-interest. (right) Raw calcium traces derived from 2 manually selected regions of interest (black) are compared to PCA/ICA traces (blue) for regions labelled as 1 and 2 on the contour map. In all traces, motion correction was applied but it had little impact given the stability of the recording. Full FOV: time course of the signal when averaged over the entire field of view. (B) Examples of PCA/ICA traces after motion correction from 2 regions of interest selected from an animal in which persistent motion artefacts (indicated by black circles) clearly contaminated the signal. This animal and these regions of interest were therefore not included in our analysis.

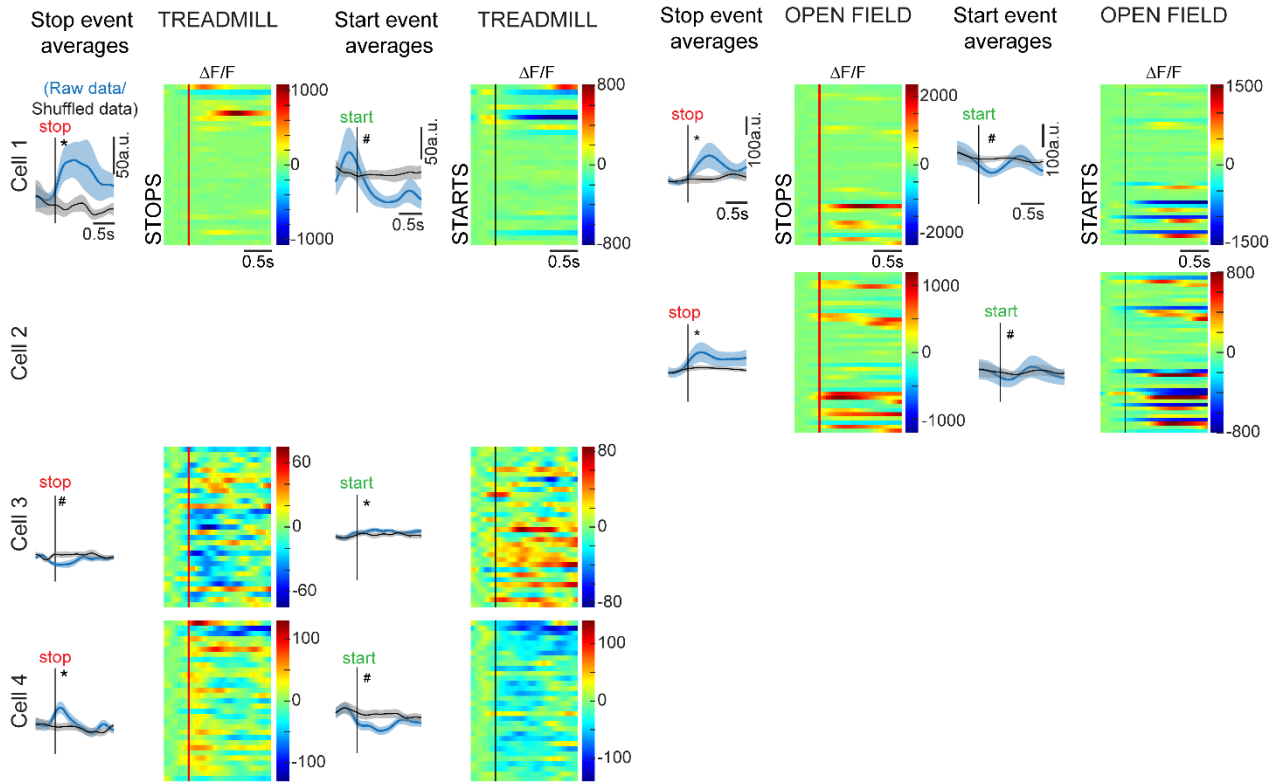

**Fig. S3. Variability of stop- and start-related activities across single trials for sample neurons.**

$\Delta F/F$  heatmaps for stop-correlated cells of the animal presented in **Fig. 3**. Each row corresponds to a single trial. Data from the treadmill (left) and open field (right) contexts are displayed. On the heatmaps, vertical red lines indicate the timing of stop events and vertical black lines indicate the onset of locomotor start events. Averaged activity traces displayed to the left of  $\Delta F/F$  heatmaps for stop-correlated cells in open field context are reproductions of **Fig. 3**. Calcium traces for all events were normalized to the average  $\Delta F/F$  values across 5 frames beginning 1 second before the event (stop or start events).

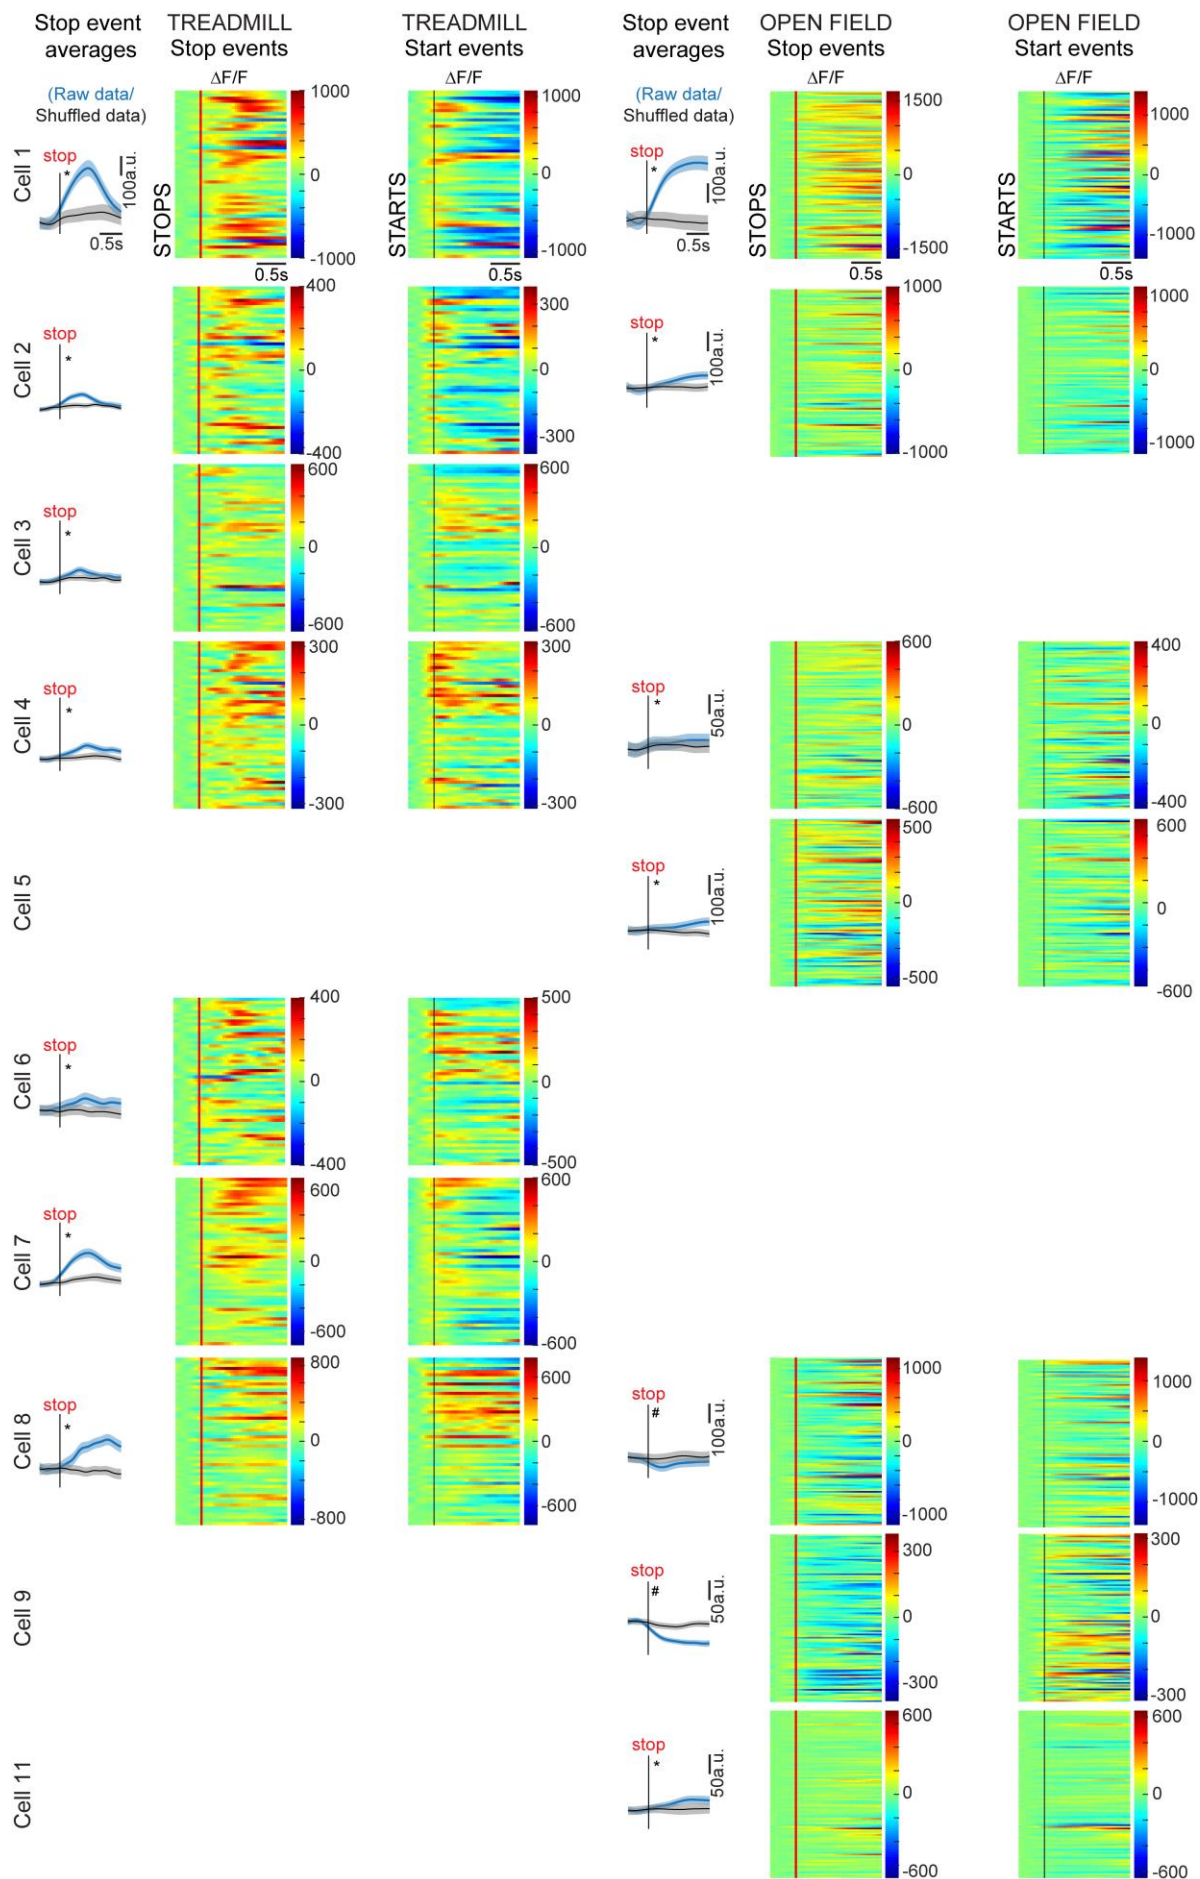

**Fig. S4. Variability of stop- and start-related activity across single trials for further sample neurons.**

$\Delta F/F$  heatmaps for stop-correlated cells presented in **Fig. 4**. Each row corresponds to a single trial. Data from the treadmill (left) and open field (right) contexts are displayed. On the heatmaps, vertical red lines indicate the timing of stop events and vertical black lines indicate the onset of locomotor start events. Averaged activity traces displayed on the left are reproductions of **Fig. 4**. Calcium traces for all events were normalized to the average  $\Delta F/F$  values across 5 frames beginning 1 second before the event (stop or start events).

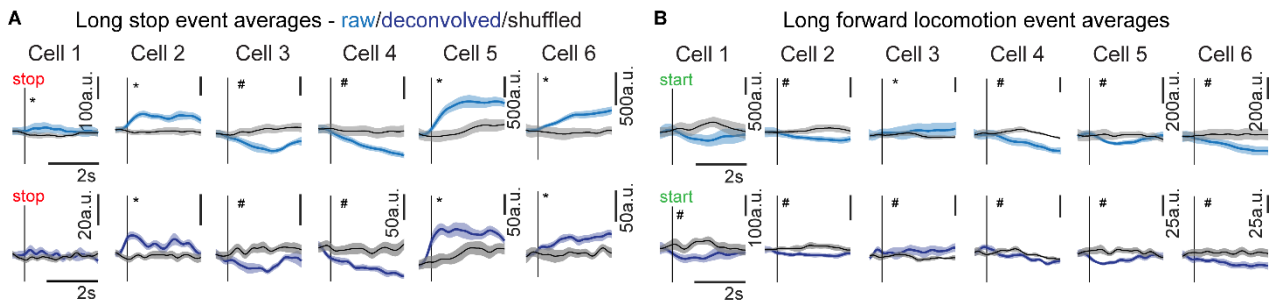

**Fig. S5. Stop- and start-related V2a neurons remain active long after event onset.**

**(A)** Average of calcium transients during long stop events from six example cells recorded in 4 different animals in the open field (raw and deconvolved data) for a minimal stop duration of 3s; \* and # represent significant differences relative to time-shuffled data for excitation and inhibition respectively (single shuffle averages in black, grey shaded areas represent SEM),  $p < 0.05$ .

**(B)** Average of calcium transients during long locomotor bouts (minimal forward locomotion duration of 3s) after a start event in six cells recorded in 3 different animals during open field exploration (raw and deconvolved data). Among 42 cells recorded in 6 animals, only these 6 cells were significantly active. The number of detected events varied between 5 and 19 per animal; \* and # represent significant differences relative to time-shuffled data for excitation and inhibition respectively (single shuffle averages in black, grey shaded areas represent SEM),  $p < 0.05$ .



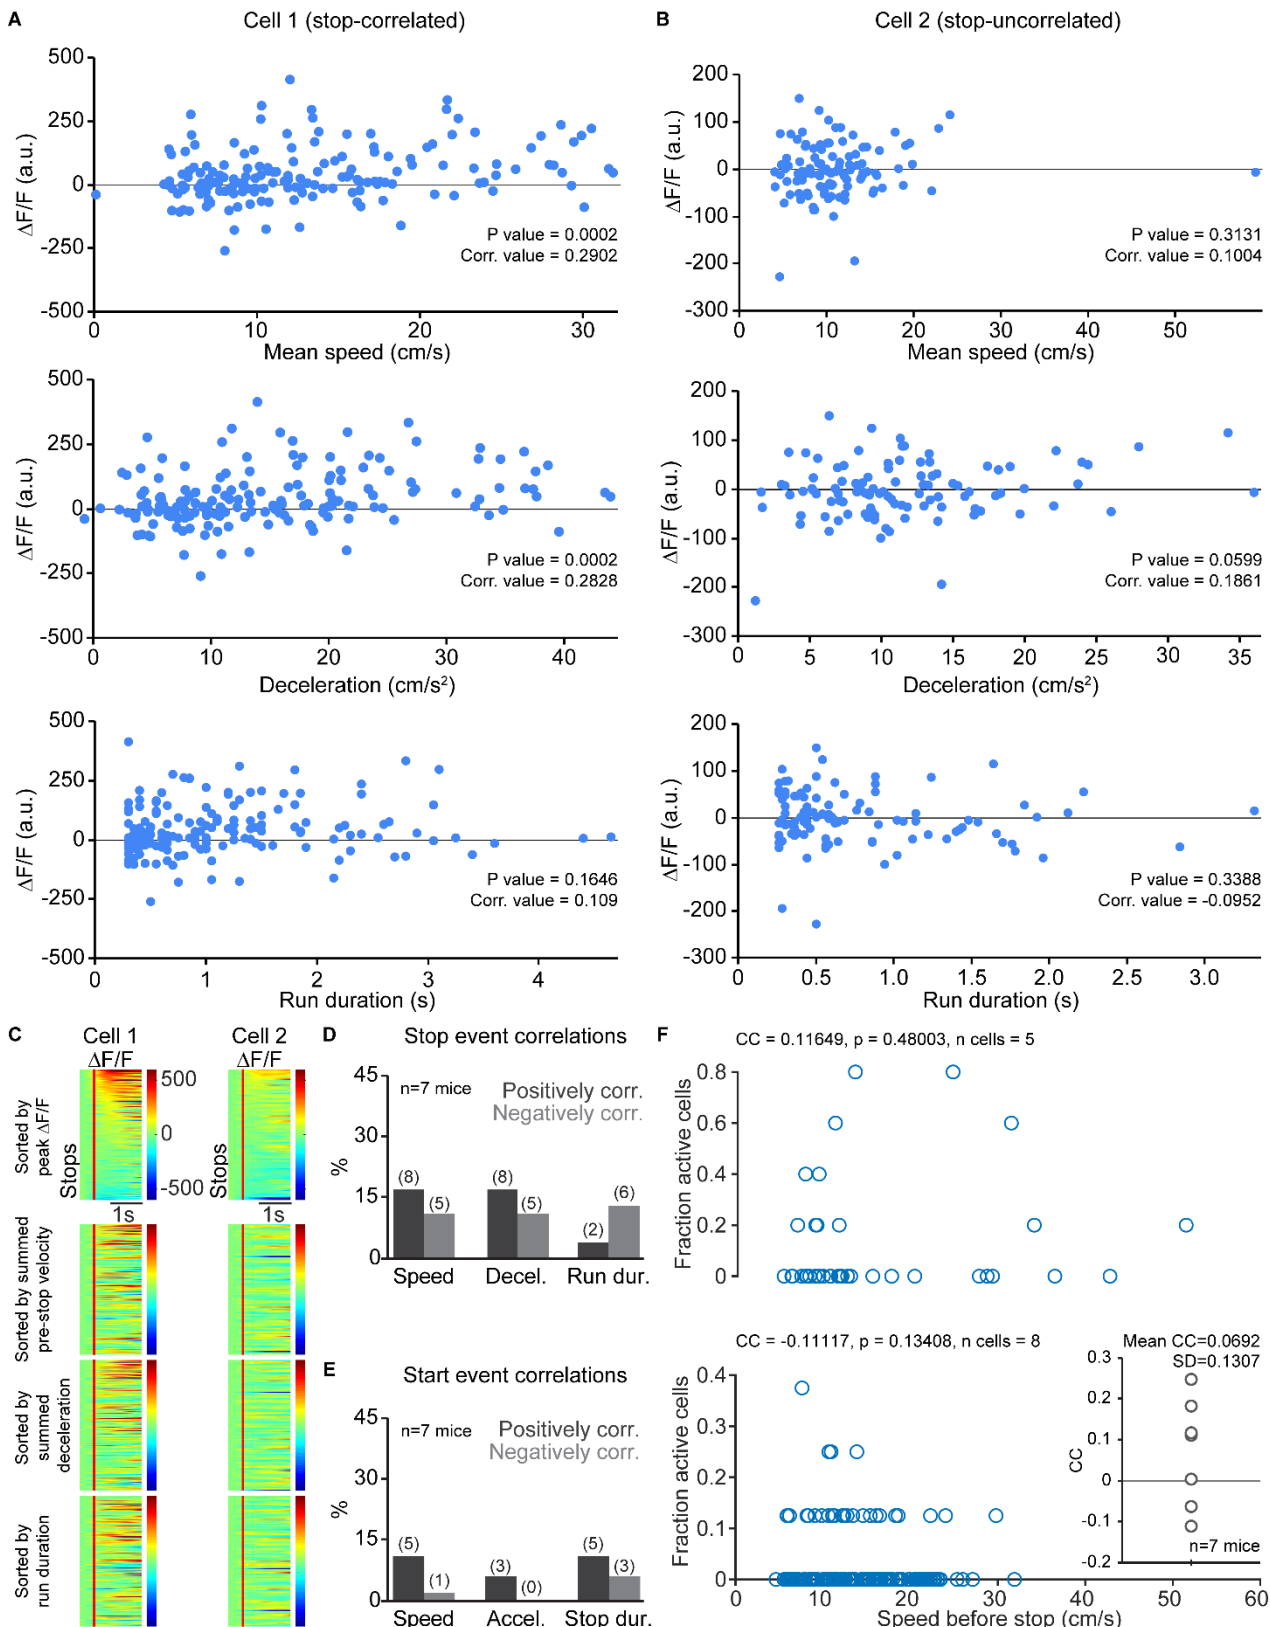

**Fig. S6. Correlations between activity of V2a neurons and locomotion parameters.**

(A) Plot of  $\Delta F/F$  value at locomotor stop events (mean between 0 and 0.5 s after stop onset) against mean speed (top) or deceleration (middle, mean during the 250 ms that precede stop onset) before

stop or against duration of the locomotor bout before stop (bottom) for a sample cell showing positive correlation with speed and deceleration. Correlation value and associated p-value (significance assessed by correlation distribution observed with the same number of observations of a random variable, Matlab) are displayed on the graphs. Data is derived from open field sessions. **(B)** Same as A. but for a non-correlated cell. **(C)** Heatmaps of single trial activities for the cells shown in A (left) and in B (right). Trials are sorted according to  $\Delta F/F$  after stop (top), speed (2nd row), deceleration (3rd row), and duration of locomotion before stop (run dur.). **(D)** Fraction of the 47 cells recorded in the open field context (7 mice) that show positive (black) or negative (grey) correlation with pre-stop speed and deceleration or with run duration. **(E)** Same as D but for start events (mean  $\Delta F/F$  calculated between 0 and 0.5 s after start onset; mean speed and acceleration calculated between 0 and 250 ms after start onset). **(F)** Plot of locomotion speed against the number of significantly activated cells ( $\Delta F/F > 1.5$  baseline SD) in each trial for two sample mice. All correlation values are given in the inset, with mean and standard deviation (SD). No significant correlation was observed between speed and  $\Delta F/F$  after stop.

**Movie S1. Example mouse during treadmill running together with calcium traces of the simultaneously imaged cells.**

Example Chx10-Cre mouse during treadmill running (top panel) with representative  $\Delta F/F$  movie (bottom left) showing V2a neuron activity with corresponding calcium transients from 4 GCaMP6s-expressing cells (bottom right; cells 1 and 3 indicated in the  $\Delta F/F$  movie). The stationary periods (red square in behavioral recording) and stops (red vertical lines in calcium data) are indicated. The video is played at half of the original speed.

**Movie S2. Example mouse during open field exploration together with calcium traces of the simultaneously imaged cells.**

Example Chx10-Cre mouse during open field exploration (top panel) with representative  $\Delta F/F$  movie (bottom left) showing V2a neuron activity with corresponding calcium transients from 5 GCaMP6s-expressing cells (bottom right; cells 1-4 indicated in the  $\Delta F/F$  movie). The stationary periods (red square in behavioral recording) and stops (red vertical lines in calcium data) are indicated. The video is played at half of the original speed.
